# Supplementary material for: Endothelial Autocrine Signaling through 2CXCL12/CXCR4/FoxM1 Axis Contributes to Severe Pulmonary Arterial Hypertension
Source: Preprints.org preprint supplement (doi:10.20944/preprints202102.0332.v2), 2021-03-15
Supplement: Supplementary file 2 [file supplementary]

﻿SUPPLEMENTAL MATERIALS

Endothelial Autocrine Signaling through CXCL12/CXCR4/FoxM1 Axis Contributes to Severe Pulmonary Arterial Hypertension

Dan Yi, Bin Liu, Ting Wang, Qi Liao, Maggie M. Zhu, You-Yang Zhao andZhiyu Dai

Supplemental Table 1, Clinical and demographic characteristics of PAH patients and control

| **ID** | **PAH or Failed Donor** | **Gender** | **Race** | **Ethnicity** | **Age** | **WHO Functional Class** | **6MWD (m)** | **mPAP**  **(mmHg)** | **CO**  **(mL/min)** | **PVR (WU)** | **Treatment** |
| --- | --- | --- | --- | --- | --- | --- | --- | --- | --- | --- | --- |
| PHBI-ST-036 | IPAH | Female | White | Non-Hispanic | 11 | No data | 243.8 | 95 | No data | No data | No data |
| PHBI-ST-042 | IPAH | Male | White | Non-Hispanic | 53 | IV | 77.7 | 45 | 4.28 | 8.18 | No data |
| PHBI-UA-026 | IPAH | Female | White | Non-Hispanic | 55 | II | 381 | 52 | 5.59 | 7.33 | No data |
| PHBI-AH-022 | Failed donor | Female | White | Non-Hispanic | 57 | N/A | N/A | N/A | N/A | N/A | N/A |
| PHBI-BA-044 | Failed donor | Male | White | Non-Hispanic | 30 | N/A | N/A | N/A | N/A | N/A | N/A |
| PHBI-BA-059 | Failed donor | Female | Asian | Non-Hispanic | 34 | N/A | N/A | N/A | N/A | N/A | N/A |

Supplemental Table 2, Primer sequences for QRT-PCR analysis

| Gene name | Forward primer | Reverse primer |
| --- | --- | --- |
| *hFOXM1* | ﻿GGAGGAAATGCCACACTTAGCG | ﻿TAGGACTTCTTGGGTCTTGGGGTG |
| *h18S rRNA* | ﻿TTCCGACCATAAACGATGCCGA | ﻿GACTTTGGTTTCCCGGAAGCTG |
| *mFoxm1* | ﻿CACTTGGATTGAGGACCACTT | GTCGTTTCTGCTGTGATTCC |
| *mCyclophilin* | ﻿GGCAAATGCTGGACCAAACAC | TTCCTGGACCCAAAACGCTC |


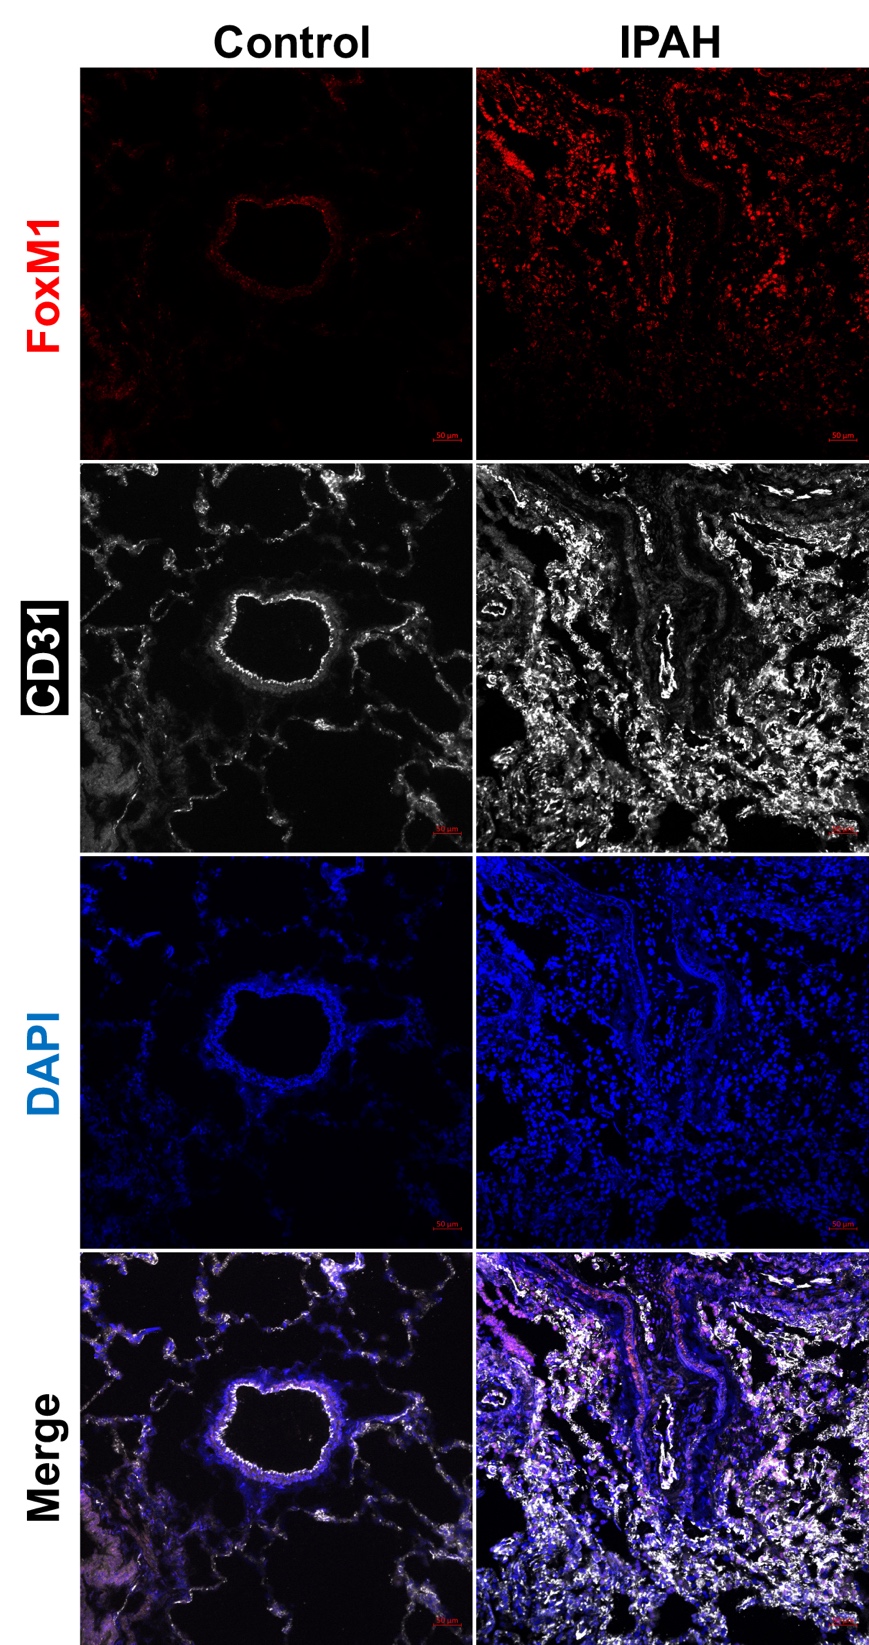


Supplemental Figure 1. Representative images of immunostaining against FoxM1 in lower magnification. Immunostaining against FoxM1 demonstrated that FoxM1 is highly expressed and induced in the lung of IPAH patients compared with failed donors (Control). Scale bar =50.
